# Supplementary material for: Keratin-inorganic hybrid nanoflowers decorated with Fe3O4 nanoparticles as enzyme mimics for colorimetric detection of glucose
Source: Royal Society of Chemistry journal article supplement (doi:10.1039/d1dt02301b), 2021-01-01
Supplement: d1dt02301b1.pdf [file d1dt02301b1.pdf]

## Supporting information

### Keratin-inorganic Hybrid Nanoflowers Decorated with Fe<sub>3</sub>O<sub>4</sub> Nanoparticles as Enzyme Mimics for Colorimetric Detection of Glucose

Peiyu Li, Jing Zheng\*, Jingli Xu, Min Zhang\*

College of Chemistry and Chemical Engineering, Shanghai University of Engineering Science, Shanghai 201620, PR China  
Email: [kkzhengjing707@163.com](mailto:kkzhengjing707@163.com) (Jing Zheng); [zhangmin@sues.edu.cn](mailto:zhangmin@sues.edu.cn) (Min Zhang).

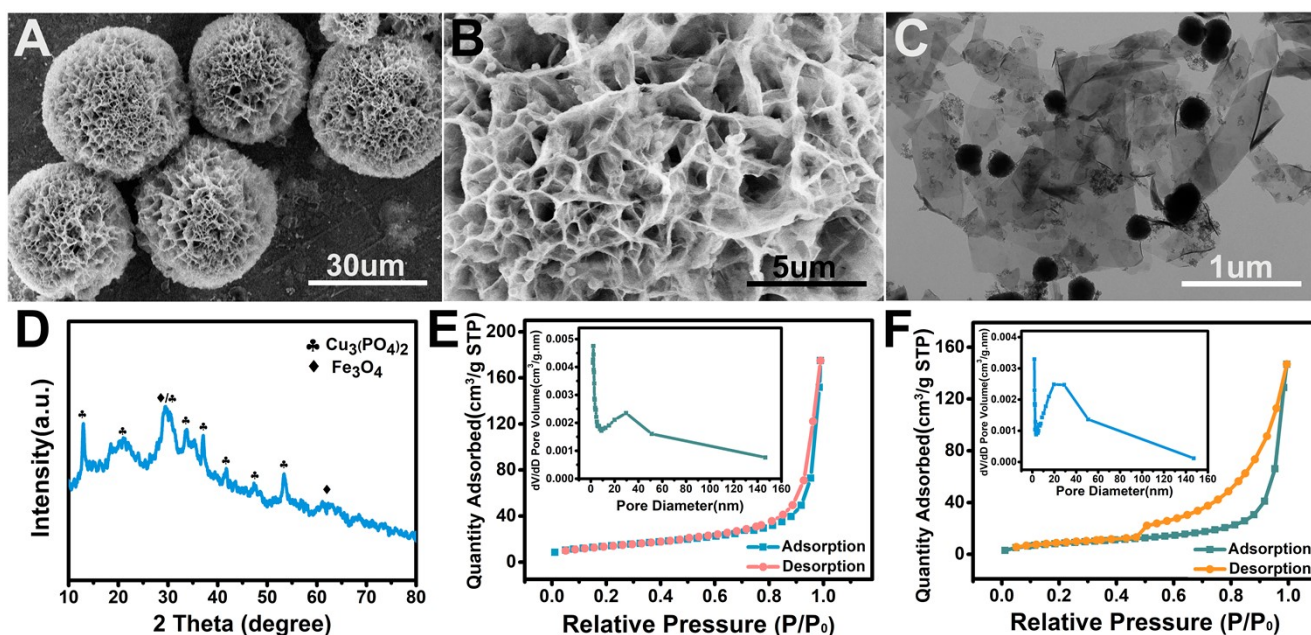

**Fig. S1** (A, B, C) The SEM and TEM images of Cu<sub>3</sub>(PO<sub>4</sub>)<sub>2</sub>@Fe<sub>3</sub>O<sub>4</sub>. (D) XRD patterns of Cu<sub>3</sub>(PO<sub>4</sub>)<sub>2</sub>@Fe<sub>3</sub>O<sub>4</sub>. (E, F) Nitrogen adsorption isotherms and pore size distribution for Cu<sub>3</sub>(PO<sub>4</sub>)<sub>2</sub>@Fe<sub>3</sub>O<sub>4</sub> and keratin-nanoflower.

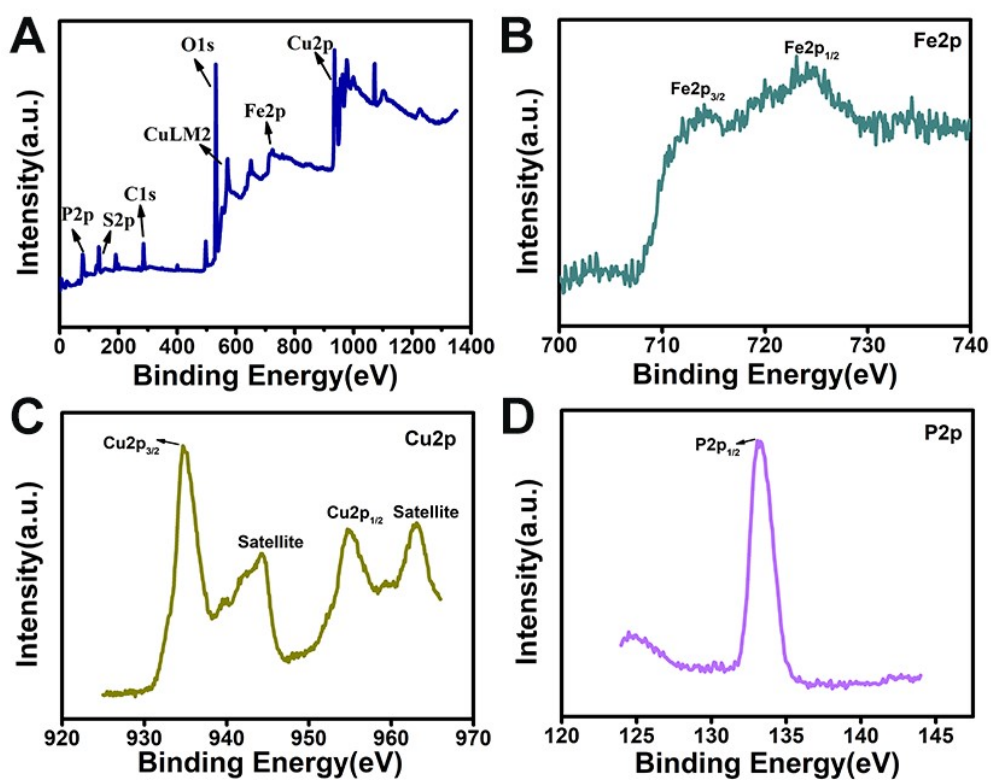

Fig. S2 XPS spectrum of keratin-nanoflower@Fe<sub>3</sub>O<sub>4</sub>: (A) survey, (B) Fe2p, (C) Cu2p, (D) P2p.

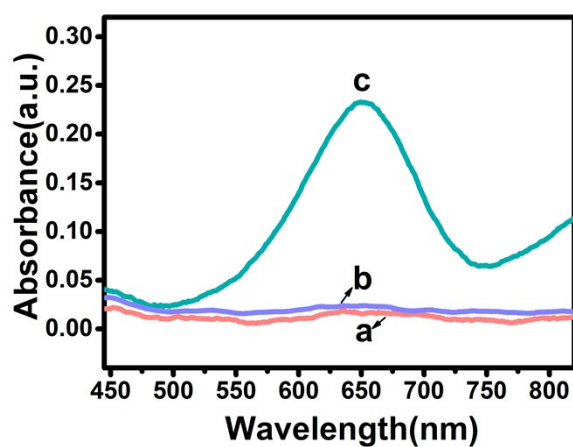

Fig. S3 UV-vis absorbance spectrum of (a) TMB, (b) H<sub>2</sub>O<sub>2</sub>, (c) oxTMB (Experiments were conducted by 0.2 mM TMB, 2.5 mM H<sub>2</sub>O<sub>2</sub> and adding 2.5 mM H<sub>2</sub>O<sub>2</sub> and 0.2 mM TMB in 370  $\mu$ L of HAc-NaAc buffer (pH 3.0), respectively)

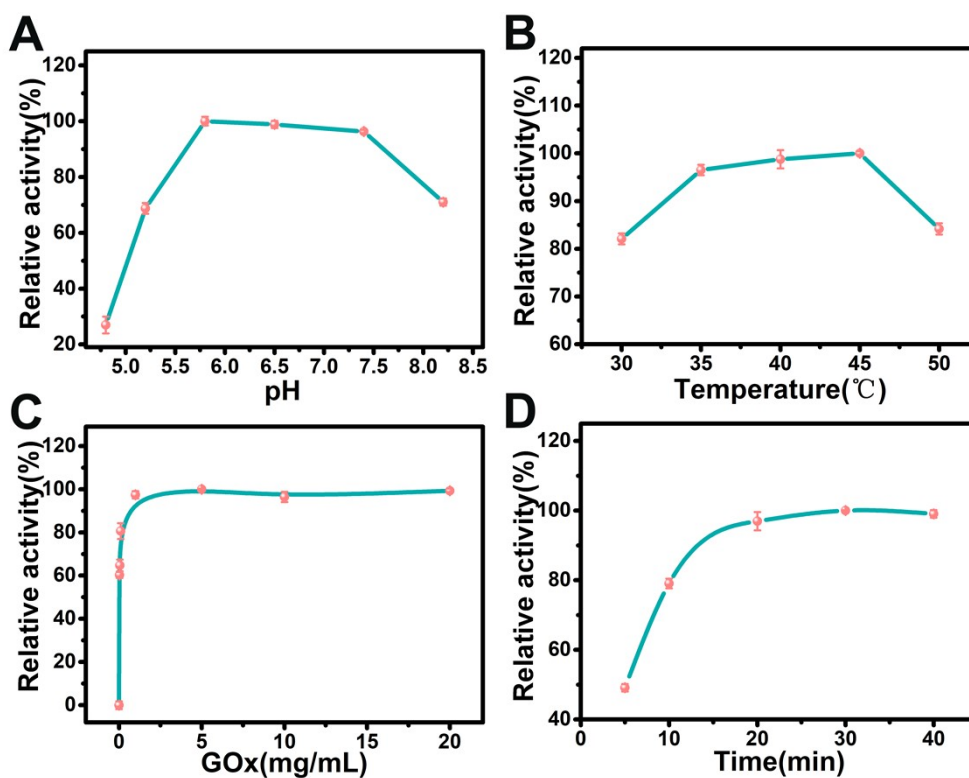

**Fig. S4** Glucose catalytic reaction under different reaction conditions. (A) varied pH values (4.8-8.2). (B) varied temperature (30-50 °C). (C) varied amounts of glucose oxidase (0-20.0 mg·mL<sup>-1</sup>). (D) varied reaction time (5-40 min). The reaction system consists of 0.2 mM TMB as substrates. Error bars indicate standard deviations from three repeated assays.

**Table S1** Comparison of the apparent kinetic parameters of varied enzyme mimics and HRP.

| Enzyme mimics                                        | K <sub>m</sub> (mM)           |        | V <sub>max</sub> (10 <sup>-8</sup> s <sup>-1</sup> ) |       | Reference |
|------------------------------------------------------|-------------------------------|--------|------------------------------------------------------|-------|-----------|
|                                                      | H <sub>2</sub> O <sub>2</sub> | TMB    | H <sub>2</sub> O <sub>2</sub>                        | TMB   |           |
| HRP                                                  | 3.7                           | 0.434  | 8.71                                                 | 10    | 1         |
| Fe <sub>3</sub> O <sub>4</sub> MNPs                  | 0.43                          | 0.71   | 13.08                                                | 5.31  | 2         |
| Fe <sub>3</sub> O <sub>4</sub> @C YSNs               | 0.035                         | 0.27   | 3.34                                                 | 12.0  | 3         |
| Fe <sub>3</sub> O <sub>4</sub> /CoFe-LDH             | 10.24                         | 0.395  | -                                                    | -     | 4         |
| Nanoflower@Ag <sub>3</sub> PO <sub>4</sub>           | 0.0155                        | 0.294  | 1.966                                                | 3.962 | 5         |
| Fe <sub>3</sub> O <sub>4</sub> @CeO <sub>2</sub> NCs | 1.13                          | 0.15   | 12.5                                                 | 0.64  | 6         |
| PB/γ-Fe <sub>2</sub> O <sub>3</sub> MNPs             | 323.6                         | 0.307  | 117                                                  | 106   | 7         |
| ZnFe <sub>2</sub> O <sub>4</sub> MNPs                | 1.66                          | 0.85   | 0.774                                                | 1.331 | 8         |
| Keratin-nanoflower@Fe <sub>3</sub> O <sub>4</sub>    | 0.0156                        | 0.2982 | 2.65                                                 | 6.406 | This work |

**Table S2** Comparison of different nanozymes for glucose detection.

| Catalysts                                                        | Linear range ( $\mu\text{M}$ ) | Detection limit ( $\mu\text{M}$ ) | Reference |
|------------------------------------------------------------------|--------------------------------|-----------------------------------|-----------|
| $\text{Fe}_3\text{O}_4@\text{C}$ YSNs                            | 1-10                           | 1.12                              | 3         |
| $\text{Fe}_3\text{O}_4$ MNs                                      | 50-1000                        | 30                                | 9         |
| Fe-doped $\text{CeO}_2$                                          | 1-100                          | 3.41                              | 10        |
| $\text{Fe}@PCN-224$                                              | 30-800                         | 22                                | 11        |
| PDI- $\text{Co}_3\text{O}_4$                                     | 5-100                          | 2.77                              | 12        |
| $\text{PtO}_2$ nanoparticles                                     | 50-1500                        | 10.8                              | 13        |
| GOx- $\text{Fe}_3(\text{PO}_4)_2 \cdot 8\text{H}_2\text{O}$ HNFs | 10-20000                       | 0.1                               | 14        |
| NL-Mn $\text{CaO}_2$                                             | 183-421                        | 23.86                             | 15        |
| $\text{MoO}_3@\text{C}$                                          | 20-6000                        | 10                                | 16        |
| $\text{H}_2\text{TCPP-Fe}_3\text{O}_4$                           | 5-25                           | 2.21                              | 17        |
| $\text{NiCo}_2\text{S}_4$                                        | 20-1000                        | 8.24                              | 18        |
| Peptide/Au NPs                                                   | 100-20000                      | 40                                | 19        |
| BSA-PtNP@ $\text{MnCo}_2\text{O}_4$                              | 10-120                         | 8                                 | 20        |
| Keratin-nanoflower@ $\text{Fe}_3\text{O}_4$                      | 5-230                          | 2.01                              | This work |

## References

1. Y. Wang, L. Xu and W. Xie, *Microchemical Journal*, 2019, **147**, 75-82.
2. M. Ma, J. Xie, Y. Zhang, Z. Chen and N. Gu, *Materials Letters*, 2013, **105**, 36-39.
3. N. Lu, M. Zhang, L. Ding, J. Zheng, C. Zeng, Y. Wen, G. Liu, A. Aldalbahi, J. Shi, S. Song, X. Zuo and L. Wang, *Nanoscale*, 2017, **9**, 4508-4515.
4. W. Yang, J. Li, M. Wang, X. Sun, Y. Liu, J. Yang and D. H. L. Ng, *Colloids Surf B Biointerfaces*, 2020, **188**, 110742.
5. T. Cao, J. Zheng, J. Xu, N. S. Alharbi, T. Hayatcd and M. Zhang, *New J. Chem*, 2019, **43**, 15946-15955.
6. F. Huang, J. Wang, W. Chen, Y. Wan, X. Wang, N. Cai, J. Liu and F. Yu, *Journal of the Taiwan Institute of Chemical Engineers*, 2018, **83**, 40-49.
7. Z. Yang, F. Ma, Y. Zhu, S. Chen, C. Wang and X. Lu, *Dalton Trans*, 2017, **46**, 11171-11179.
8. L. Su, J. Feng, X. Zhou, C. Ren, H. Li and X. Chen, *Anal Chem*, 2012, **84**, 5753-5758.
9. H. Wei and E. Wang, *Anal Chem*, 2008, **80**, 2250-2254.
10. D. Jampaiah, T. Srinivasa Reddy, A. E. Kandjani, P. R. Selvakannan, Y. M. Sabri, V. E. Coyle, R. Shukla and S. K. Bhargava, *J Mater Chem B*, 2016, **4**, 3874-3885.
11. T. Li, P. Hu, J. Li, P. Huang, W. Tong and C. Gao, *Colloids and Surfaces A: Physicochemical and Engineering Aspects*, 2019, **577**, 456-463.
12. Y. Ding, M. Chen, K. Wu, M. Chen, L. Sun, Z. Liu, Z. Shi and Q. Liu, *Mater Sci Eng C Mater Biol Appl*, 2017, **80**, 558-565.
13. X. Liu, Y. Zhou, J. Liu and H. Xia, *Spectrochim Acta A Mol Biomol Spectrosc*, 2021, **248**, 119280.
14. J. Guo, Y. Wang and M. Zhao, *Sensors and Actuators B: Chemical*, 2019, **284**, 45-54.
15. S. Rashtbari, G. Dehghan and M. Amini, *Anal Chim Acta*, 2020, **1110**, 98-108.
16. H. Ren, L. Yan, M. Liu, Y. Wang, X. Liu, C. Liu, K. Liu, L. Zeng and A. Liu, *Sensors and Actuators B: Chemical*, 2019, **296**, 126517.
17. Q. Liu, H. Li, Q. Zhao, R. Zhu, Y. Yang, Q. Jia, B. Bian and L. Zhuo, *Mater Sci Eng C Mater Biol Appl*, 2014, **41**, 142-151.
18. Z. Huang, W. He, H. Shen, G. Han, H. Wang, P. Su, J. Song and Y. Yang, *Talanta*, 2021, **230**, 122337.
19. X. Wu, J. Yin, J. Liu, Y. Gu, S. Wang and J. Wang, *Analyst*, 2020, **145**, 7234-7241.
20. M. Liu, J. Mou, X. Xu, F. Zhang, J. Xia and Z. Wang, *Talanta*, 2020, **220**, 121374.
